# Supplementary material
Source: Springer Nature journal article supplement (https://www.springermedizin.de/resource/supplementary/12884_2014_1242_MOESM2_ESM.pdf/9459034)

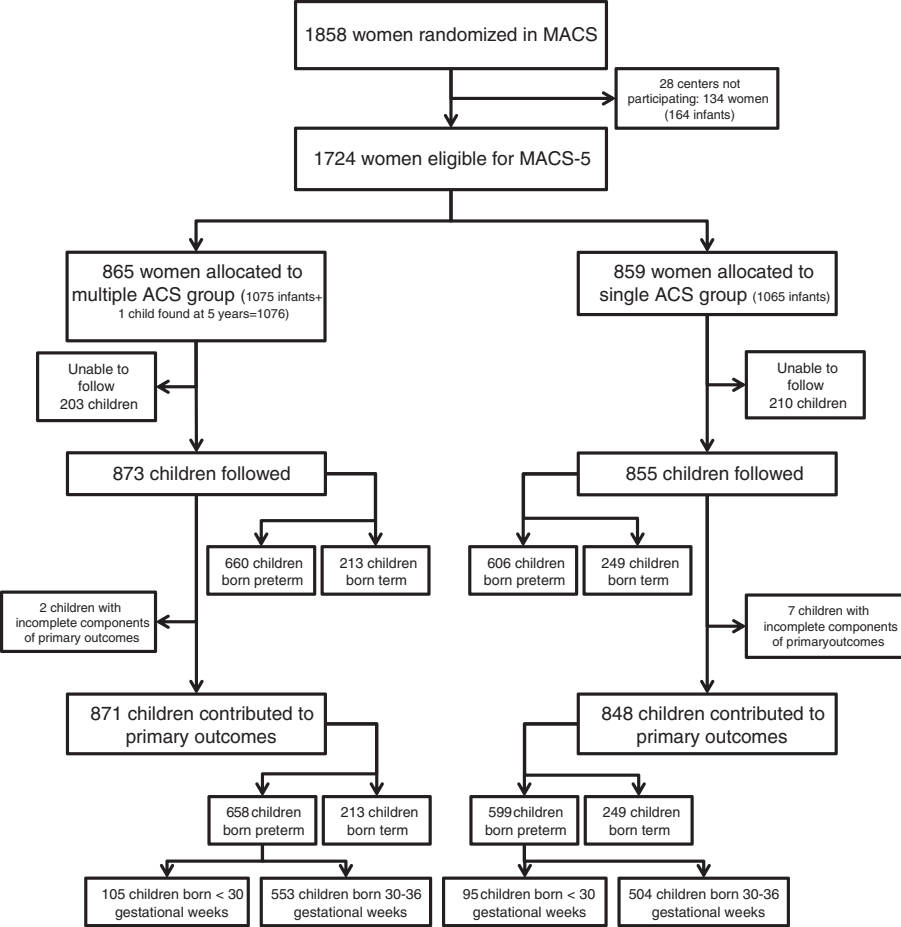

ACS = antenatal corticosteroid therapy

Supplement: MOESM2 [file 9459034]
